# Supplementary material for: Integrative DNA methylome analysis of pan-cancer biomarkers in cancer discordant monozygotic twin-pairs
Source: PubMed Central journal article supplement (PMC4721070; doi:10.1186/s13148-016-0172-y), 2016-01-20

Figure S1

**A**

cg26079695 in *COL11A2*

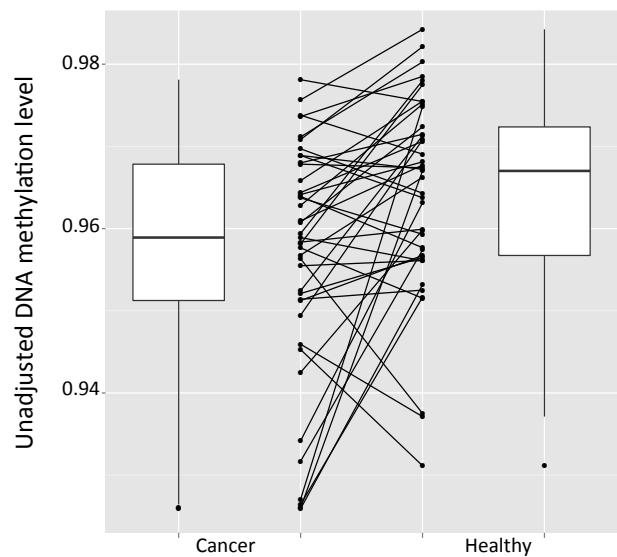

**B**

cg27094856 in *AXL*

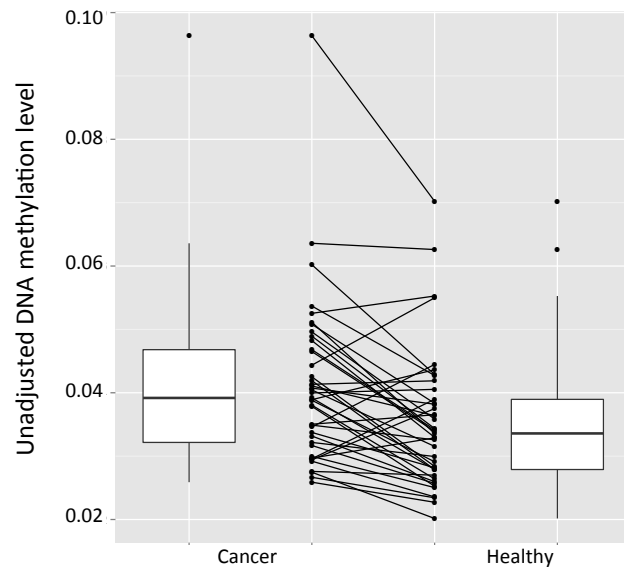

**C**

cg21046959 in *LINC00340*

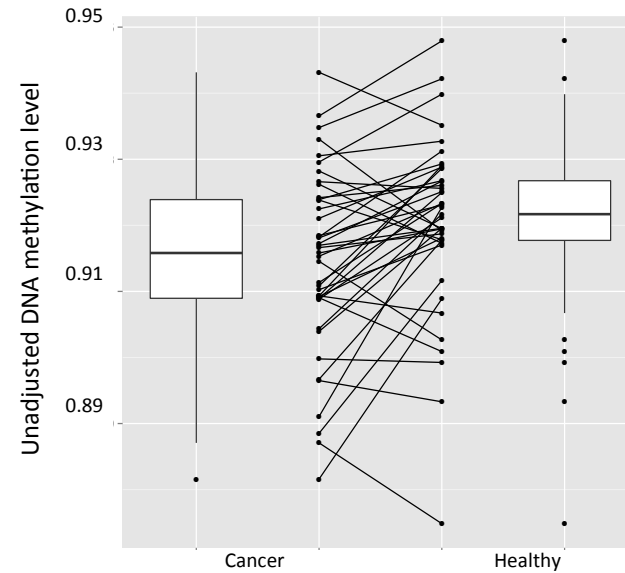

Supplement: 13148_2016_172_MOESM1_ESM.pdf [file 13148_2016_172_MOESM1_ESM.pdf]
